# Supplementary material for: The unique evolutionary dynamics of the SARS-CoV-2 Delta variant
Source: bioRxiv or medRxiv preprint supplement (doi:10.1101/2021.08.05.21261642), 2021-09-22
Supplement: Supplementary file [file media-1.pdf]

Supplementary information: The unique evolutionary dynamics of the SARS-CoV-2 Delta variant

|                                                            | Sequence at loci<br>28881-28887 | Amino acid<br>replacements in N |
|------------------------------------------------------------|---------------------------------|---------------------------------|
| Reference sequence isolate Wuhan-Hu-1, GenBank ID MN908947 | GGGGAAC                         | NA                              |
| Clade 20B (leading to Alpha, Gamma, Lambda)                | AACGAAC                         | R203K, G204R                    |
| Clade 20A (leading to Delta)                               | TGGGAAC                         | R203M                           |
| Clade 20C mutation (leading to Beta, Epsilon)              | GGGGAAT                         | T205I                           |

**Figure S1. Substitutions in the region corresponding to amino-acids 203-205 in the N gene, across different clades.** Shown are nucleotides substitutions that occurred independently in each lineage. The three substitutions in clade 20B are thought to lead to the creation of a new transcriptional regulatory sequence (TRS) AACGAAC, whereas the other substitutions are not expected to create one.

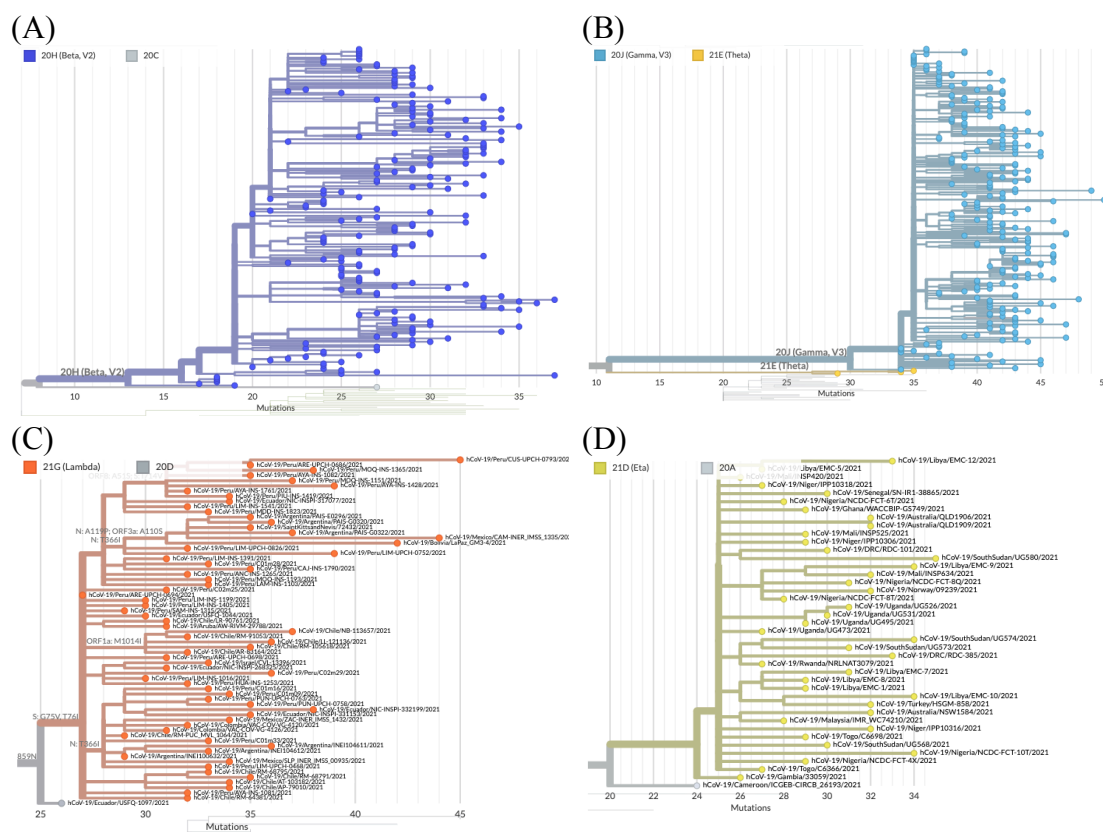

**Figure S2. Divergence-based phylogenies of the (A) Beta, (B) Gamma, (C) Lambda, (D) Eta variants.** All phylogenies show “star-like” phylogenies. Figures were generated by NextStrain on August 1 2021.

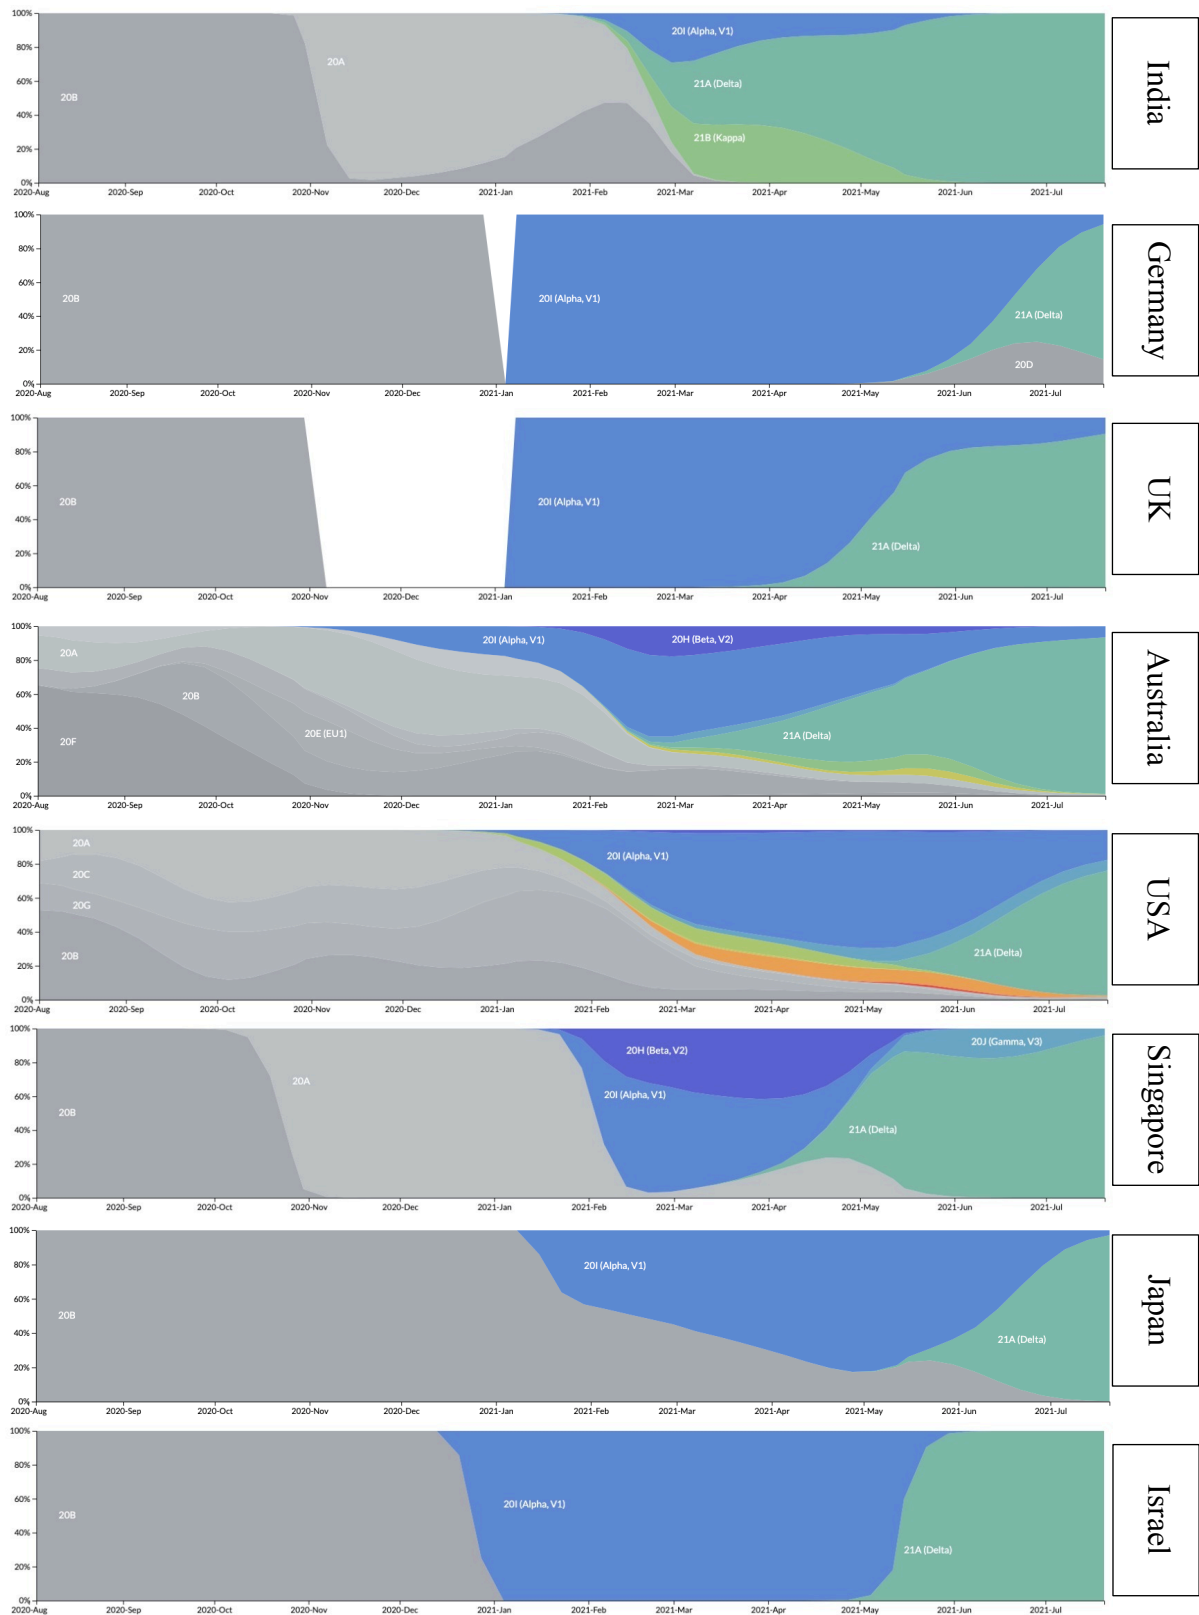

**Figure S3. Prevalence of NextStrain clades in different countries in the world, corresponding to Figure 4 of the main text. Figures were generated by NextStrain on August 1 2021.**
